# Supplementary material
Source: publisher figshare collection journal article supplement (https://tandf.figshare.com/articles/dataset/_/5657305)
Supplement: Supplementary file 1 [file 1]

Table S1 Nucleotide sequences of primers used in this study

| Primer name         | Nucleotide sequence (5'-3')                                                |
|---------------------|----------------------------------------------------------------------------|
| PmalPupsen          | TA <u>ACTGCAGG</u> CATGTACGATGTTGATCC                                      |
| PmalPantiSalI       | TGGG <u>TCGAC</u> CTTGGGTGCGGTATGCAATAG                                    |
| TglAAsenXbaI        | TGGT <u>CTAGAT</u> CATCATGTCCCAGTGAAGAG                                    |
| TglAAantiSmaI       | CAC <u>CCCGGG</u> TTTCGAGATGATTAGCTACTAG                                   |
| GFPsenSalI          | AAAG <u>TCGAC</u> CATGGTGAGCAAGGGCGAG                                      |
| GFP5GAantiNotI      | TTT <u>GCGGCCG</u> CTCCTGCTCCAGCGCCTGCACCAGCTCCCTTGTACAGCTCGTCCATGCCG      |
| GGs-fw-NotI         | AGGAG <u>CGGCCG</u> CGGCATATACGGTCAACCCA                                   |
| GGs-rv-SpeI         | TATG <u>ACTAGT</u> TTTACGACAGCCTAGTAATCTTAT                                |
| ACS-fw-NotI         | CTCCGCGGCCGCATGGTTCCAATTTCTGACTCG                                          |
| ACS-rv-SpeI         | AAAA <u>ACTAGT</u> TTTCCCGTTCCGAACAAC                                      |
| P450-1-fw-InF       | <i>CCGCA</i> CCCAAGTCGACCATGTCACACTTTCTACC                                 |
| P450-1-rv-InF       | <i>AGTCACGTGGCGGCCGC</i> CATCGAACAACCGGCTTAAG                              |
| P450-2-fw-SalI      | TCCAGT <u>TCGAC</u> CCTCAACACTATGATCAAACACAG                               |
| P450-2-rv-NotI      | ACAAG <u>CGGCCG</u> CACAAAGCCTTGGCTAGCATCG                                 |
| P450-1(ΔSS)-fw-SpeI | ATAC <u>ACTAGT</u> GAAATCACAGCATGAGAATGATATATAACGTTTTTC                    |
| P450-1(ΔSS)-rv-SpeI | CAAG <u>ACTAGT</u> TCGAACAACCGGCTTAAGAT                                    |
| P450-2(ΔTM)-fw-InF  | <i>TATCAGATA</i> AAATGGCCAAGCAACCGACTAAGTCGGCC                             |
| (ΔTM)-N ter.-rv     | AGGGCGAGCCATTGGCTTCCACATAGCTCTTGATC                                        |
| (ΔTM)-C ter.-fw     | GGAAGCCAATGGCTCGCCCTTGCGTCTCAAC                                            |
| P450-2(ΔTM)-rv-InF  | <i>AGTCACGTGGCGGCCGC</i> ACAAAGCCTTGGCTAGCATCG                             |
| Use1-fw-NotI        | AAAAG <u>CGGCCG</u> CGACAATAACAACATACCCCGG                                 |
| Use1-rv-SpeI        | AAAA <u>ACTAGT</u> TCAGAACCGCAATTTCTGGAC                                   |
| Sed5-fw-NotI        | AAAAG <u>CGGCCG</u> CGACTGGCCCATCGATTCA                                    |
| Sed5-rv-SpeI        | AAAA <u>ACTAGT</u> CTATCCTGATATCAATACCCA                                   |
| Nyv1-fw-NotI        | AAAAG <u>CGGCCG</u> CGGCCTCATCCTCAAAGCC                                    |
| Nyv1-rv-SpeI        | AAAA <u>ACTAGT</u> TCACTCACTATGACCGACAC                                    |
| Tlg2-fw-NotI        | AAAAG <u>CGGCCG</u> CGTGGCGAGATCGCACGAATTT                                 |
| Tlg2-rv-SpeI        | AAAA <u>ACTAGT</u> CTATCGGTGTATGTCAGGATC                                   |
| PTS1-fw-EcoRV       | AGAAGATATCGCTCCTGCATAAGAGG                                                 |
| PTS1-rv-NotI        | AAAAG <u>CGGCCG</u> CTACAGACGGGACGCTCCTGCTCCAGCGCC                         |
| mCherry5GAsenSpeI   | GTG <u>ACTAGT</u> TGGAGCTGGTGCAAGGCGCTGGAGCAGGAGCTGTGAGCAAGGGCGAGGAGGATAAC |
| CmCherry-antiXbaI   | CTTT <u>CTAGAA</u> CTTGTACAGCTCGTCCATG                                     |
| H2B-fw-InF          | <i>GACAAGCTTGCGGCCGCC</i> CATGGCACCCAAGGCTGCTG                             |
| H2B-rv-InF          | <i>CACCAGCTCCACTAGT</i> TTTGGCAGAAGAGGAGTACTTCG                            |
| PlaA-fw-InF         | <i>GACAAGCTTGCGGCCGCC</i> CATGCTGTCCTGTACCTCCCCCT                          |
| PlaA-rv-InF         | <i>CACCAGCTCCACTAGT</i> AAAGAGGCACAAACCCCTCCAT                             |
| P450-1-fw-InF2      | <i>GACAAGCTTGCGGCCGCC</i> CATGTCACACTTTCTACCTAC                            |
| P450-1-rv-InF2      | <i>CACCAGCTCCACTAGT</i> TCGAACAACCGGCTTAAG                                 |
| P450-2-fw-InF       | <i>GACAAGCTTGCGGCCGCC</i> CTCAACACTATGATCAAACACAG                          |
| P450-2-rv-InF       | <i>CACCAGCTCCACTAGT</i> CAAAGCCTTGGCTAGCATCG                               |
| bipA-EGFP-fw-SalI   | CCAAGT <u>CGAC</u> ATGGCGCGACTATCGAGTCG                                    |
| bipA-EGFP-rv-SpeI   | TATG <u>ACTAGT</u> TTTACAGTTTCGTCATGCCCAGAGG                               |
| TP-fw-NheI          | ATGCG <u>CTAGC</u> GCGATGCATCCAGATCAAGC                                    |
| TP-rv-SpeI          | GGTC <u>ACTAGT</u> TCAAGCAGCTGGCACGGCATC                                   |
| P450-1-fw-InF3      | <i>GATGCGCTAGCGGCCGCC</i> CATGTCACACTTTC                                   |
| P450-1-rv-InF       | <i>TACCCGGGTCACTAGT</i> TCATCGAACAACCGGCTTAAGATACATGTTTAACG                |
| P450-1(ΔSS)-fw-InF2 | <i>GATGCGCTAGCGGCCGCC</i> GAATCACAGCATGAGAATGATATATAACGTTTTTC              |

Restriction sites are underlined. Italics indicate homologous sequences to vector ends for In-Fusion cloning.
