# Supplementary material
Source: publisher figshare collection journal article supplement (https://tandf.figshare.com/articles/dataset/_/5657305)
Supplement: Supplementary file 2 [file 1]

Fig. S1

## PbP450-1

|     |                                                               |     |
|-----|---------------------------------------------------------------|-----|
| 1   | <u>MSHFLPTLIILTSLLTVAYVLA</u> RMIIYNVFIYHPLSAFPGDAFFCATGLTKAY | 50  |
| 51  | HMIAGDLQLKVKDMHDKYGSVVRIAPTELSFSYCSAWKDIYGSRGGRELS            | 100 |
| 101 | KFYDFYRVDEAMPQHIIISAGKAKHSILRRYLAHGFSNAMKAQEPVILDL            | 150 |
| 151 | VNLLMQRLREHAEEGARVVDVNKWFNFATFEIIGKLTFTGADLGNLRNRDW           | 200 |
| 201 | HPWVKGSANNMNVVGFMAAANSVGLGPIIKWCISNEILPRQKYLDELAEM            | 250 |
| 251 | VQKRTGVTVERPDFIQGLLRDDVQLSNGEIVANVEALIGAGSESTATLLT            | 300 |
| 301 | GTVCALLQNPDQLAKVIDEVRSTFRTEDEITLHSVQRLDYMLACLNETFR            | 350 |
| 351 | YPPVTNGMPRVTPKEGAIIGGRLVPGNTVVAIWQWAICHDPALWKDPYT             | 400 |
| 401 | FRPERFLEAPEFSTDVREALNPFVSGTRNCIGRNLSYAETRLILARLFYY            | 450 |
| 451 | FDLELADPDQDWFGAQKAYLVWDAPALNMYLKPVVR                          | 486 |

## PbP450-2

|     |                                                           |     |
|-----|-----------------------------------------------------------|-----|
| 1   | MIKHSLSDCCLADPDHLIRIKSYVEAN <u>VRFLGLSLVTLLVTIQMFRA</u> L | 50  |
| 51  | LRLNKPLVGRRSILEPRWLVLGRFTKGGRELLRQAYKKYKDEIFKVQCND        | 100 |
| 101 | TEICVLPHRYVEELRGLPASKVSSPQALYNKGLGSYTGLEVIVESHLEHFQ       | 150 |
| 151 | AIQGHLLTPNLASALGIVLDELQDALKTVLPDCSDEWVPFDVHTVLSLV         | 200 |
| 201 | RLSSRVFGGLELARNQQWIQLSTAYPRNAFACTMALRMVPRIIRPLLA          | 250 |
| 251 | LPTYWRTRSNIIRDAKRIVGGIITKRRADGATDMSAKEHPCDLLQWMMNA        | 300 |
| 301 | AAGTETHADDLAHRLLFISDASVMTTSLISHCLYDLVAHPEALSCIREE         | 350 |
| 351 | VHNVLREGDNFQKTTLHKMRSLDSALKESQRLNPPFLMTFDRVVREPL          | 400 |
| 401 | SDGTQIPVGTHLAMPTDAMLQDSSLLPQGGVAPDQFDPFRYARAREDP          | 450 |
| 451 | AQRFQLATTEAKSLVFGHGKHACPGRFFASSEAKIILSHLLLLLYDFRY         | 500 |
| 501 | GKGRPESWLFSENVDAIDPNARLLIKKRNDAAASNLAAMLAKAL              | 541 |

Fig. S1. Amino acid sequences of PbP450-1 and PbP450-2. Transmembrane domains predicted by Transmembrane Helix Prediction (<http://www.cbs.dtu.dk/services/TMHMM/>) are underlined in red.

Fig. S2

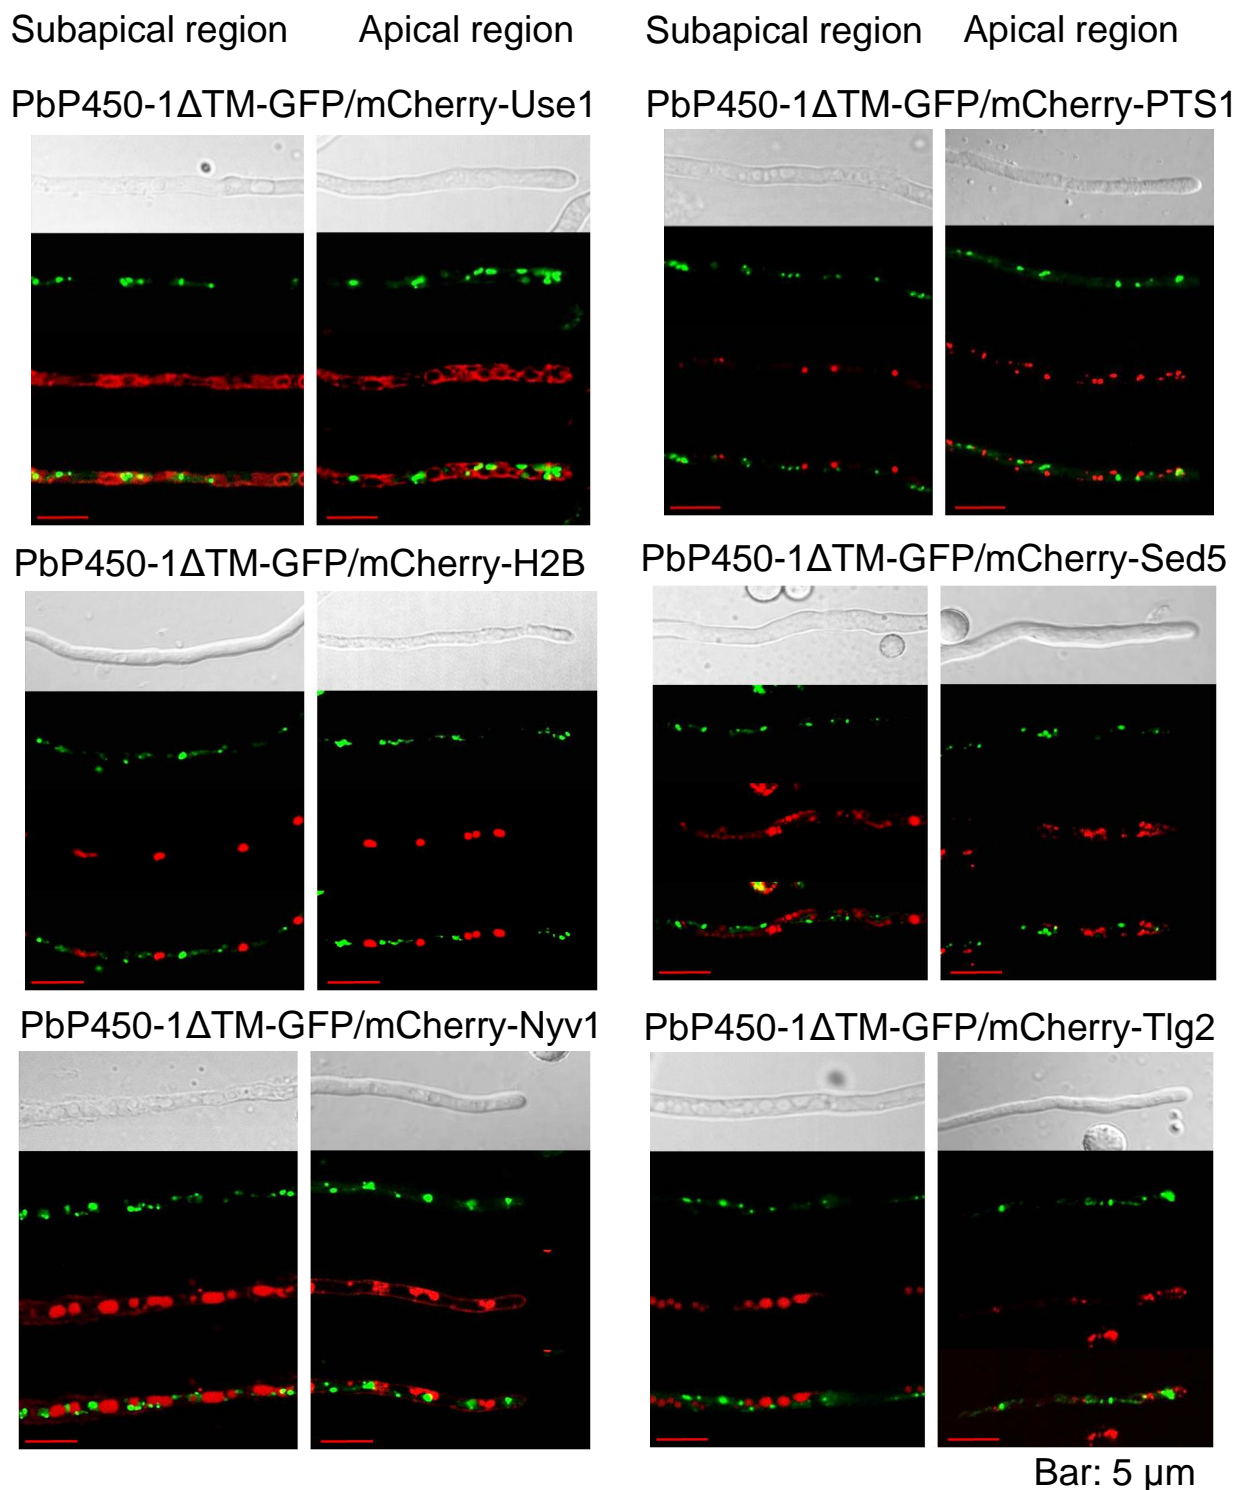

Fig. S2. Colocalization analysis of GFP-fused PbP450-1 $\Delta$ TM-GFP and mCherry-fused organelle markers. Hyphae were examined by a laser scanning confocal microscope.

Fig. S3

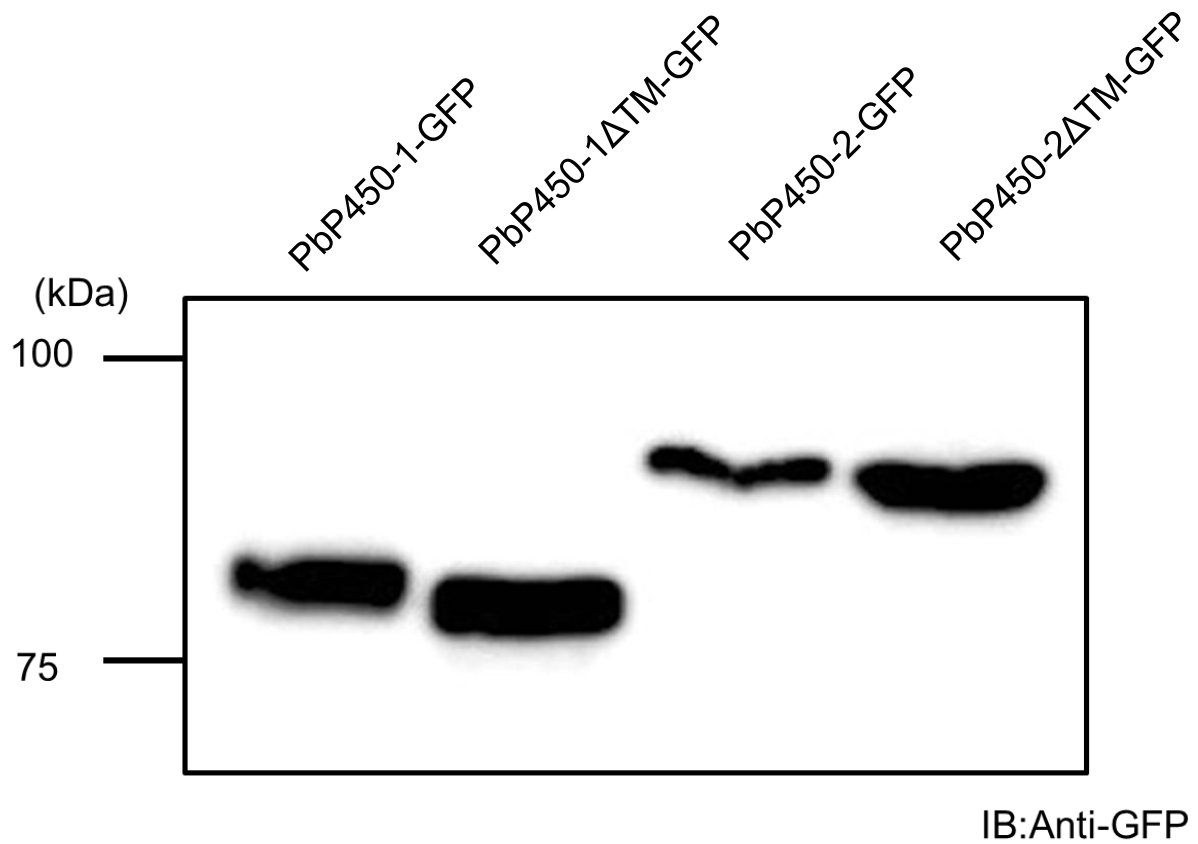

Fig. S3 Western blot analysis of PbP450-1ΔTM-GFP and PbP450-2ΔTM-GFP. Mycelia grown for 36 h in MM with 1% casamino acids as the sole carbon source were transferred to fresh MM with 1% maltose, and incubated for 6 h. Cell lysates extracted from harvested mycelia were subjected to western blot analysis using anti-GFP antibody.
